# Supplementary material
Source: PubMed Central journal article supplement (PMC3226733)
Supplement: NIHMS331385-supplement-FIg_1.pdf [file NIHMS331385-supplement-FIg_1.pdf]

Supplemental Fig. 1

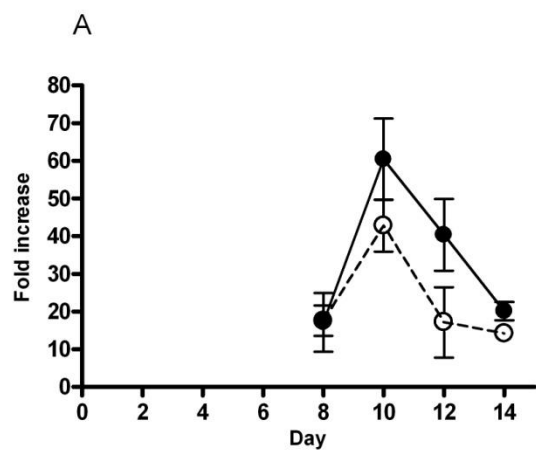

IFN $\gamma$

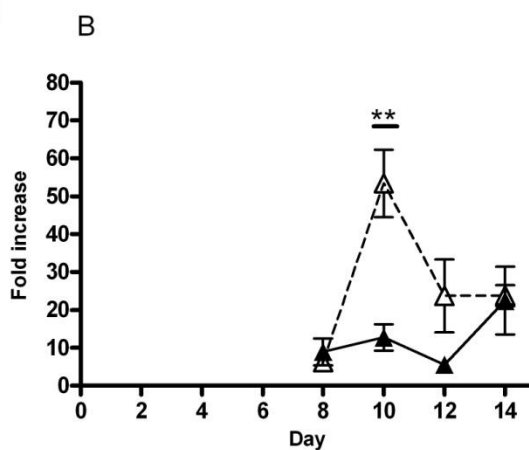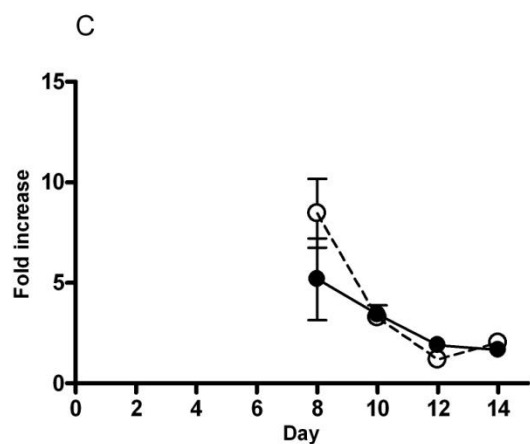

Mx1

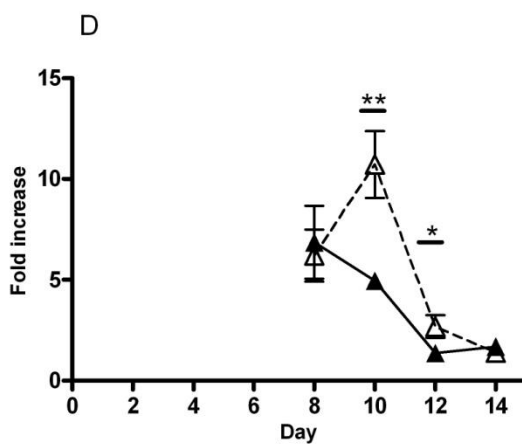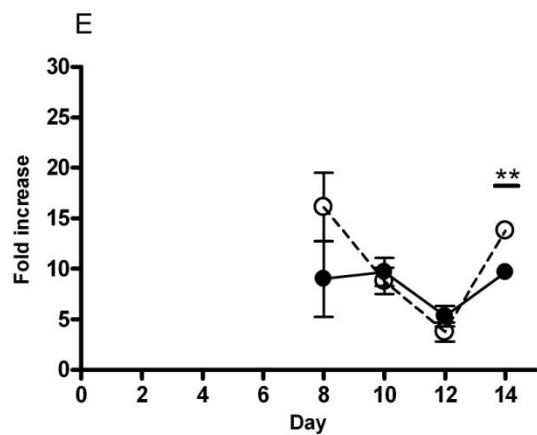

OAS

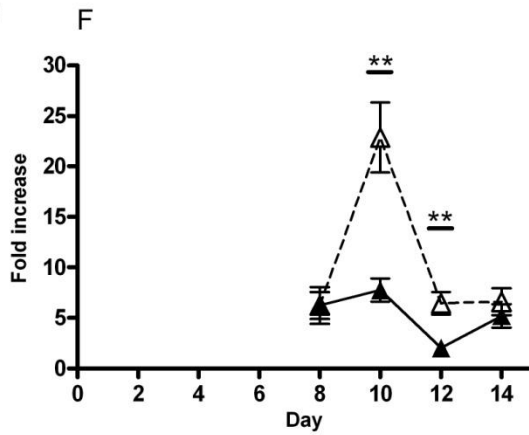

● 50M B6->F1  
○ 50M CD80KO->F1

▲ 20M B6->F1  
△ 20M CD80KO->F1
