# Supplementary material
Source: PubMed Central journal article supplement (PMC3226733)

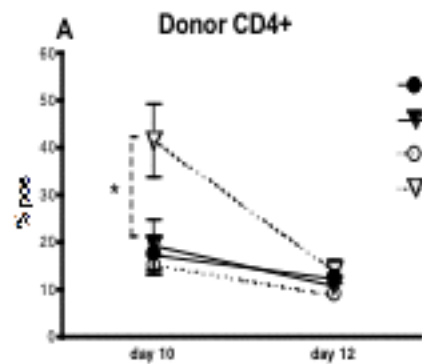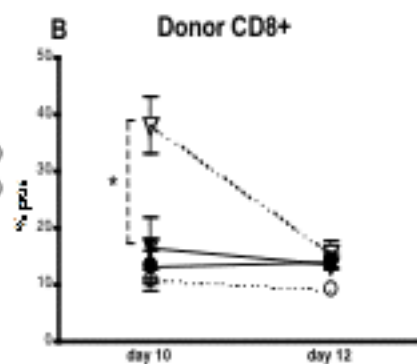

Supplement: NIHMS331385-supplement-Fig_2.pdf [file NIHMS331385-supplement-Fig_2.pdf]
