# Supplementary material
Source: PubMed Central journal article supplement (PMC3226733)

# Host B cells

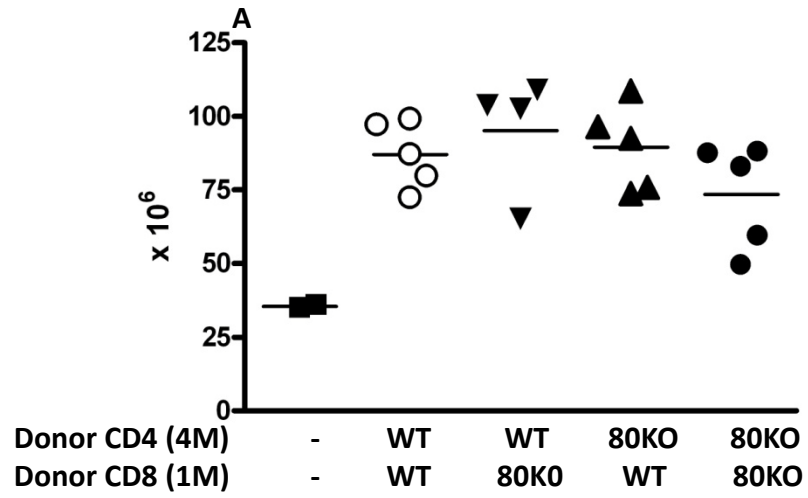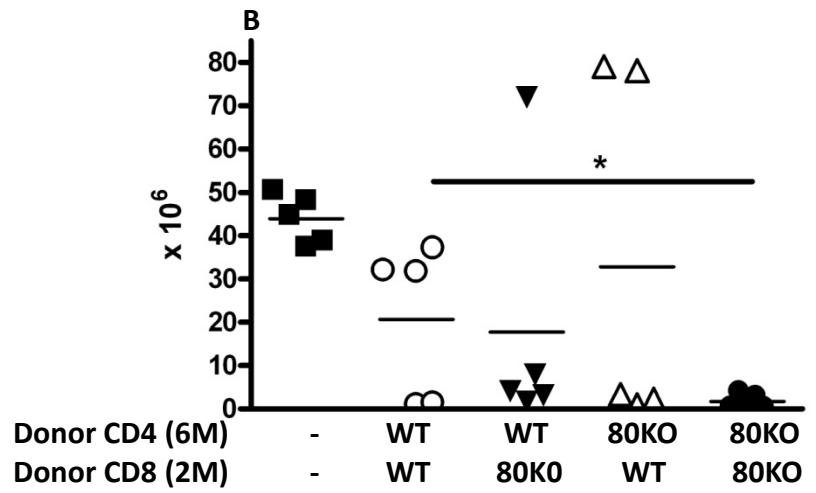

Supplement: NIHMS331385-supplement-Fig_3.pdf [file NIHMS331385-supplement-Fig_3.pdf]
